# Supplementary material
Source: MDPI journal article supplement (https://www.mdpi.com/2673-4095/3/3/27)
Supplement: s1 [file s1 › surgeries-1834427-supplementary.pdf]

Table S1: Questionnaire and variables of the survey

| Question                                                                                                                                                                                                                                                                                                                                                                                                                                                                                                             | Answers                                                                                                                                                                                                          | Variable (type)                                        |
|----------------------------------------------------------------------------------------------------------------------------------------------------------------------------------------------------------------------------------------------------------------------------------------------------------------------------------------------------------------------------------------------------------------------------------------------------------------------------------------------------------------------|------------------------------------------------------------------------------------------------------------------------------------------------------------------------------------------------------------------|--------------------------------------------------------|
| How old are you?                                                                                                                                                                                                                                                                                                                                                                                                                                                                                                     | <30 years, 30-39 years, 40-49 years, 50-59 years, >59 years                                                                                                                                                      | Age-group (forced choice)                              |
| What is your gender?                                                                                                                                                                                                                                                                                                                                                                                                                                                                                                 | female, male, divers                                                                                                                                                                                             | Gender (forced choice)                                 |
| I work in the following setting:                                                                                                                                                                                                                                                                                                                                                                                                                                                                                     | university hospital, independent pediatric surgical department, pediatric surgical workplace in general surgery or pediatrics, private practice, other, not in pediatric surgery                                 | Work-setting (forced choice)                           |
| If other: please specify                                                                                                                                                                                                                                                                                                                                                                                                                                                                                             |                                                                                                                                                                                                                  | (open)                                                 |
| If not in pediatric surgery: please specify                                                                                                                                                                                                                                                                                                                                                                                                                                                                          |                                                                                                                                                                                                                  | (open)                                                 |
| Working time                                                                                                                                                                                                                                                                                                                                                                                                                                                                                                         | full-time, part-time, I am not working.                                                                                                                                                                          | Working time (forced choice)                           |
| If part-time: how many % of a full-time job?                                                                                                                                                                                                                                                                                                                                                                                                                                                                         |                                                                                                                                                                                                                  | (open)                                                 |
| I am in partnership.                                                                                                                                                                                                                                                                                                                                                                                                                                                                                                 | yes / no                                                                                                                                                                                                         | Partnership (forced choice)                            |
| If yes: my partner works                                                                                                                                                                                                                                                                                                                                                                                                                                                                                             | full-time, part-time, is not working                                                                                                                                                                             | Working-time partner (forced choice)                   |
| If part-time: how many % of a full-time job?                                                                                                                                                                                                                                                                                                                                                                                                                                                                         |                                                                                                                                                                                                                  | (open)                                                 |
| Do you have children?                                                                                                                                                                                                                                                                                                                                                                                                                                                                                                | yes / no                                                                                                                                                                                                         | Children (forced choice)                               |
| How old are your children? (separated values for each child)                                                                                                                                                                                                                                                                                                                                                                                                                                                         | 0 years / 1-3 years / 4-6 years / 7-10 years / 11-13 years / 14-17 years / grown-up                                                                                                                              | Age-group children (forced choice)                     |
| If you have underage children: please specify the kind of childcare for each child for the assumption that there was no pandemic                                                                                                                                                                                                                                                                                                                                                                                     | parents / other family members (e.g. grandparents) / private (e.g. au pair, babysitter) / institutional (e.g. kindergarten, day-care) / institutional by employer (e.g. kindergarten, day-care) / school / other | Childcare without pandemic (forced choice)             |
| What kind of effects does the pandemic have on your working conditions?<br><ul style="list-style-type: none"> <li>There are fewer patients and fewer surgeries.</li> <li>I have to do more work due to the COVID-19 pandemic.</li> <li>New possibilities were created to work more flexibly.</li> <li>Already existing possibilities to work more flexibly were used better.</li> <li>For parents, opportunities to combine work and family were established.</li> <li>Work-related arrangements are more</li> </ul> | strongly agree / rather agree / don't know / rather disagree / strongly disagree / I cannot say                                                                                                                  | Effects pandemic on working conditions (Lickert Scale) |

|                                                                                                                                                                                                                                                                                                                                      |                                                                                                                                                                                                                                                                                           |                                                        |
|--------------------------------------------------------------------------------------------------------------------------------------------------------------------------------------------------------------------------------------------------------------------------------------------------------------------------------------|-------------------------------------------------------------------------------------------------------------------------------------------------------------------------------------------------------------------------------------------------------------------------------------------|--------------------------------------------------------|
| <p>difficult because colleagues work more flexibly.</p> <ul style="list-style-type: none"> <li>• I have to organize more for my job.</li> <li>• I had to organize more to be able to go to work.</li> </ul>                                                                                                                          |                                                                                                                                                                                                                                                                                           |                                                        |
| Did you or your colleagues experience redeployment to other departments due to the pandemic?                                                                                                                                                                                                                                         | no / sometimes / often / regularly                                                                                                                                                                                                                                                        | Redeployment (Lickert Scale)                           |
| Does your work-place give the opportunity to perform work in home-office?                                                                                                                                                                                                                                                            | no / yes, it was established during the pandemic / yes, it was available before the pandemic                                                                                                                                                                                              | Home-office opportunity (forced choice)                |
| How often do you use the option to work in home-office?                                                                                                                                                                                                                                                                              | never / rarely / sometimes / often / always                                                                                                                                                                                                                                               | Home-office used (Lickert Scale)                       |
| How often does your partner use the option to work in home-office?                                                                                                                                                                                                                                                                   | never / rarely / sometimes / often / always                                                                                                                                                                                                                                               | Home-office used by partner (Lickert Scale)            |
| The reconciliation of family and working life worked well for me before the lockdown.                                                                                                                                                                                                                                                | strongly agree / rather agree / don't know / rather disagree / strongly disagree / I cannot say                                                                                                                                                                                           | Work-family-balance before (Lickert Scale)             |
| The reconciliation of family and working life during the lockdown was                                                                                                                                                                                                                                                                | better / equal / worse than before the lockdown.                                                                                                                                                                                                                                          | Work-family-balance during (forced choice)             |
| How did you mainly organize childcare during the lockdown?                                                                                                                                                                                                                                                                           | other family members (e.g. grandparents) / private (eg. au pair, babysitter) / institutional emergency child-care / child-care organized by employer / one parent stayed home / home-office (self) / home-office (partner) / children stayed home for a longer time by themselves / other | Childcare during lockdown (forced choice)              |
| Did you have to adapt your work time to the times of child-care?                                                                                                                                                                                                                                                                     | yes / no / partly                                                                                                                                                                                                                                                                         | Adaption of work time (forced choice)                  |
| If yes: how many % of a full-time job?                                                                                                                                                                                                                                                                                               |                                                                                                                                                                                                                                                                                           | (open)                                                 |
| Did you take a leave for your children?                                                                                                                                                                                                                                                                                              | yes / no                                                                                                                                                                                                                                                                                  | Leave for childcare (forced choice)                    |
| If yes: how many days since the beginning of the pandemic?                                                                                                                                                                                                                                                                           |                                                                                                                                                                                                                                                                                           | (open)                                                 |
| My employer acknowledged the change of work time or home office.                                                                                                                                                                                                                                                                     | strongly agree / rather agree / don't know / rather disagree / strongly disagree / I cannot say                                                                                                                                                                                           | Acknowledgement employer (Lickert Scale)               |
| The head of my department acknowledged my situation.                                                                                                                                                                                                                                                                                 | strongly agree / rather agree / don't know / rather disagree / strongly disagree / I cannot say                                                                                                                                                                                           | Acknowledgement head (Lickert Scale)                   |
| <p>What is the impact of COVID-19 lockdown on the work-family balance?</p> <ul style="list-style-type: none"> <li>• We grew closer together.</li> <li>• We calmed down; our life was less stressful.</li> <li>• Our life was more stressful.</li> <li>• The altered childcare situation is a great burden for our family.</li> </ul> | strongly agree / rather agree / don't know / rather disagree / strongly disagree / I cannot say                                                                                                                                                                                           | Impact Covid-19 on work-family-balance (Lickert Scale) |

|                                                                                                                              |                                                                                                              |                                   |
|------------------------------------------------------------------------------------------------------------------------------|--------------------------------------------------------------------------------------------------------------|-----------------------------------|
| <ul style="list-style-type: none"> <li>The pandemic offered new possibilities to improve our work-family balance.</li> </ul> |                                                                                                              |                                   |
| The pandemic showed new possibilities for the reconciliation of family and working life to me.                               | strongly agree / rather agree / don't know / rather disagree / strongly disagree / I cannot say              | New possibilities (Lickert Scale) |
| What elements would you prefer to keep after the pandemic?                                                                   | home office / change of working hours / reduction of working hours / special days off for child-care / other | Elements to keep (forced choice)  |
| If other: please specify                                                                                                     |                                                                                                              | (open)                            |
| Would you like to add something?                                                                                             |                                                                                                              | Comments (open)                   |
